# Supplementary material for: Retinol initiated poly(lactide)s: stability upon polymerization and nanoparticle preparation
Source: Royal Society of Chemistry journal article supplement (doi:10.1039/c7py00881c), 2017-01-01
Supplement: c7py00881c1.pdf [file c7py00881c1.pdf]

## Supporting Information

# Retinol initiated poly(lactide)s: Stability upon polymerization and nanoparticle preparation

*Ilknur Yildirim,<sup>a,b,†</sup> Turgay Yildirim,<sup>a,b,†</sup> Diana Kalden,<sup>c</sup> Grit Festag,<sup>a,b</sup> Nicole Fritz,<sup>a,b</sup>  
Christine Weber,<sup>a,b</sup> Stephanie Schubert,<sup>b,d</sup> Matthias Westerhausen,<sup>c</sup> Ulrich S. Schubert<sup>a,b\*</sup>*

<sup>a</sup> Laboratory of Organic and Macromolecular Chemistry (IOMC), Friedrich Schiller University Jena, Humboldtstr. 10, 07743 Jena, Germany

<sup>b</sup> Jena Center for Soft Matter (JCSM), Friedrich Schiller University Jena, Philosophenweg 7, 07743 Jena, Germany

<sup>c</sup> Institute of Inorganic and Analytical Chemistry (IAAC), Friedrich Schiller University Jena, Humboldtstr. 8, 07743 Jena, Germany

<sup>d</sup> Institute of Pharmacy, Department of Pharmaceutical Technology, Friedrich Schiller University Jena, Otto-Schott-Str. 41, 07745 Jena, Germany

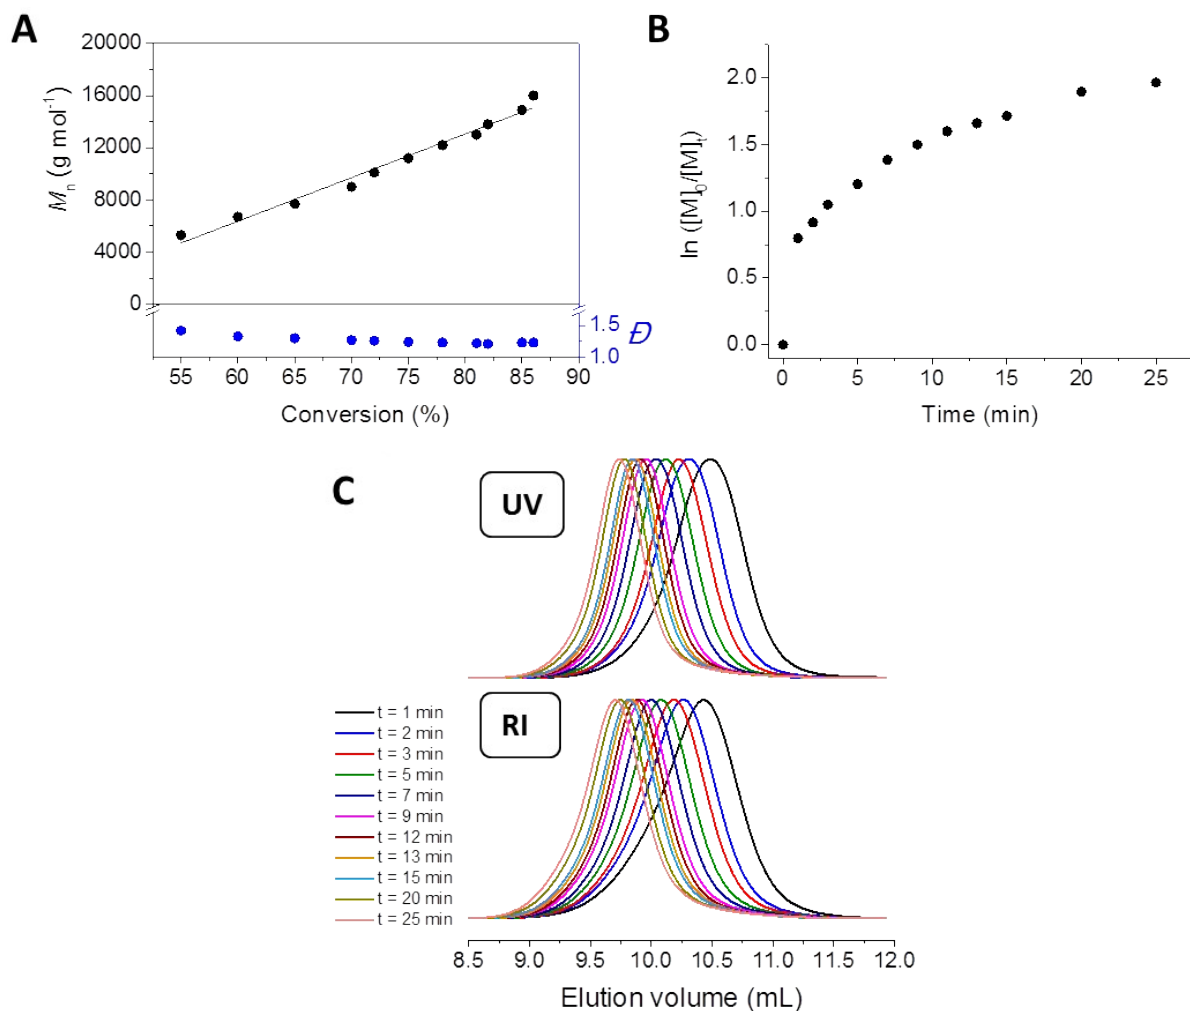

**Figure S1.** Kinetic study of retinol initiated ROP of L-lactide performed at room temperature in THF with a total monomer concentration of 1 mol L<sup>-1</sup>. [M]/[Retinol]/[Ca]= 100/1/0.5. **(A)** Dependence of  $M_{n,SEC}$  and  $\bar{D}$  of the obtained PLA on the conversion of L-lactide. **(B)** Semilogarithmic kinetic plot. **(C)** Overlay of the SEC elugrams recorded with RI and UV ( $\lambda = 340$  nm) detection.

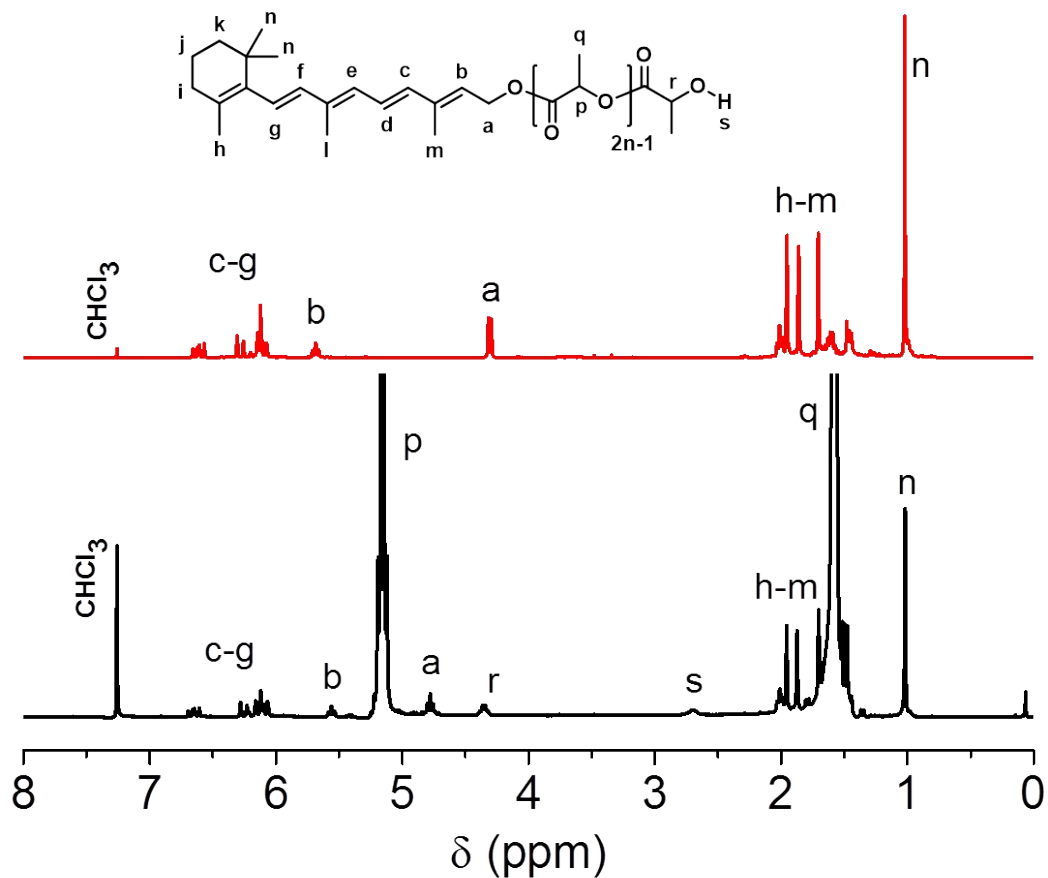

**Figure S2.** Overlay of  $^1\text{H}$  NMR spectra (400 MHz,  $\text{CDCl}_3$ ) of retinol and retinol initiated PLA (**P1**) together with the assignment of the observed peaks.

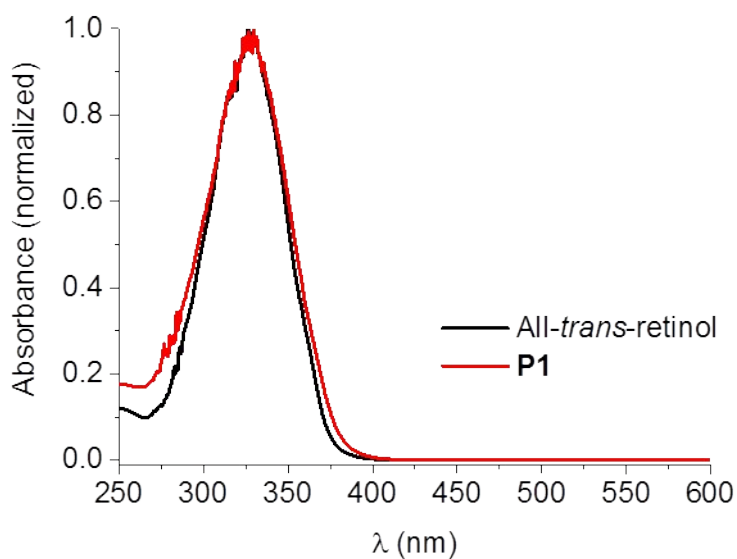

**Figure S3.** Overlay of UV/vis spectra of all-*trans*-retinol ( $c = 0.015 \text{ mg mL}^{-1}$ ) and **P1** ( $0.185 \text{ mg mL}^{-1}$ ) recorded in THF.

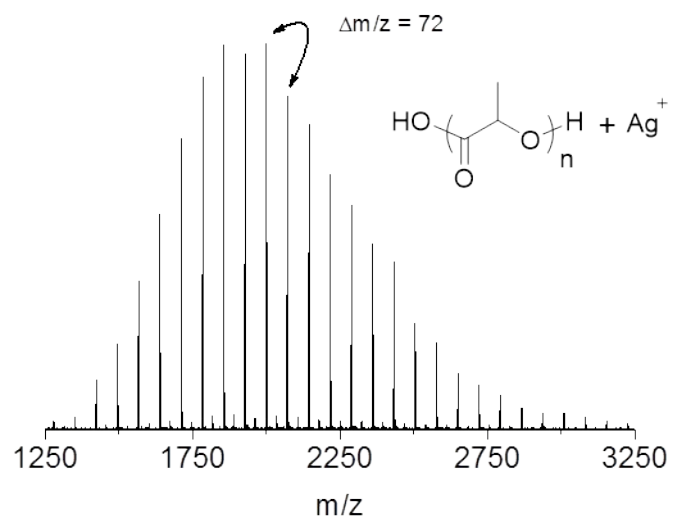

**Figure S4.** MALDI-ToF mass spectrum of **P1** (AgTFA, DCTB).

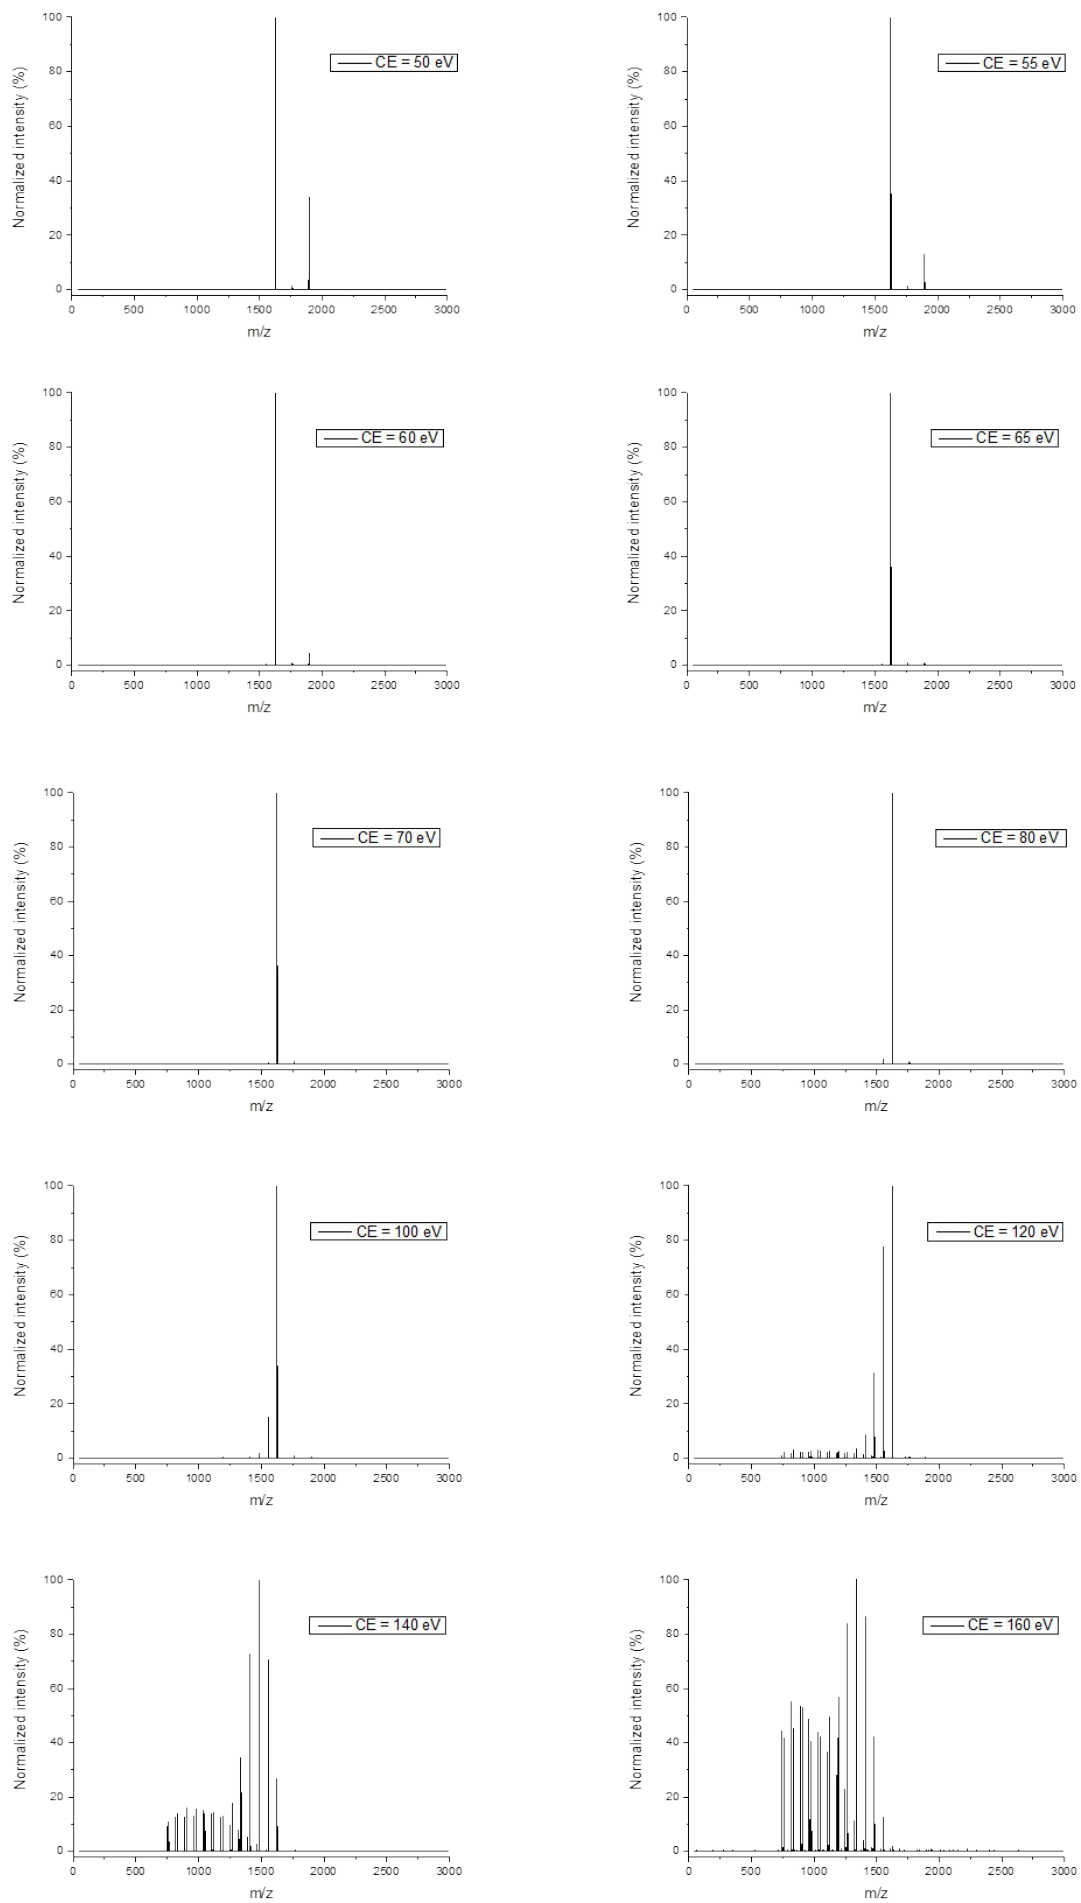

**Figure S5.** ESI-Q-ToF MS/MS spectra of sodiated **P1** at  $m/z = 1893.7$  recorded at different collision energy values (50 to 160 eV).

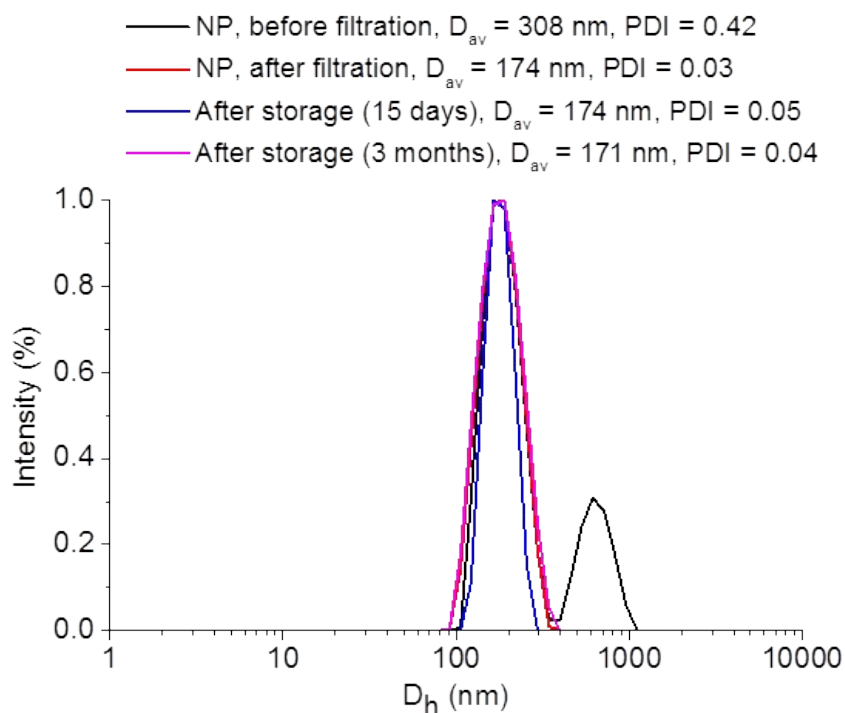

**Figure S6.** Normalized intensity size distributions of **P1** nanoparticles in water.

**Table S1.** Zeta potential values of the nanoparticles in aqueous suspension.

| Entry     | Method <sup>a</sup> | Zeta potential <sup>b</sup><br>[mV] |
|-----------|---------------------|-------------------------------------|
| <b>P1</b> | AW                  | $-53 \pm 2$                         |
|           | WA                  | $-40 \pm 1$                         |
| <b>P2</b> | AW                  | $-52 \pm 2$                         |
|           | WA                  | $-49 \pm 2$                         |
| <b>P3</b> | AW                  | $-48 \pm 2$                         |
|           | WA                  | $-32 \pm 1$                         |
| <b>P4</b> | AW                  | $-30 \pm 1$                         |
|           | WA                  | $-50 \pm 2$                         |

<sup>a</sup>AW, dropping acetone to water; WA, dropping water to acetone. <sup>b</sup>Average values of three zeta potential measurements.

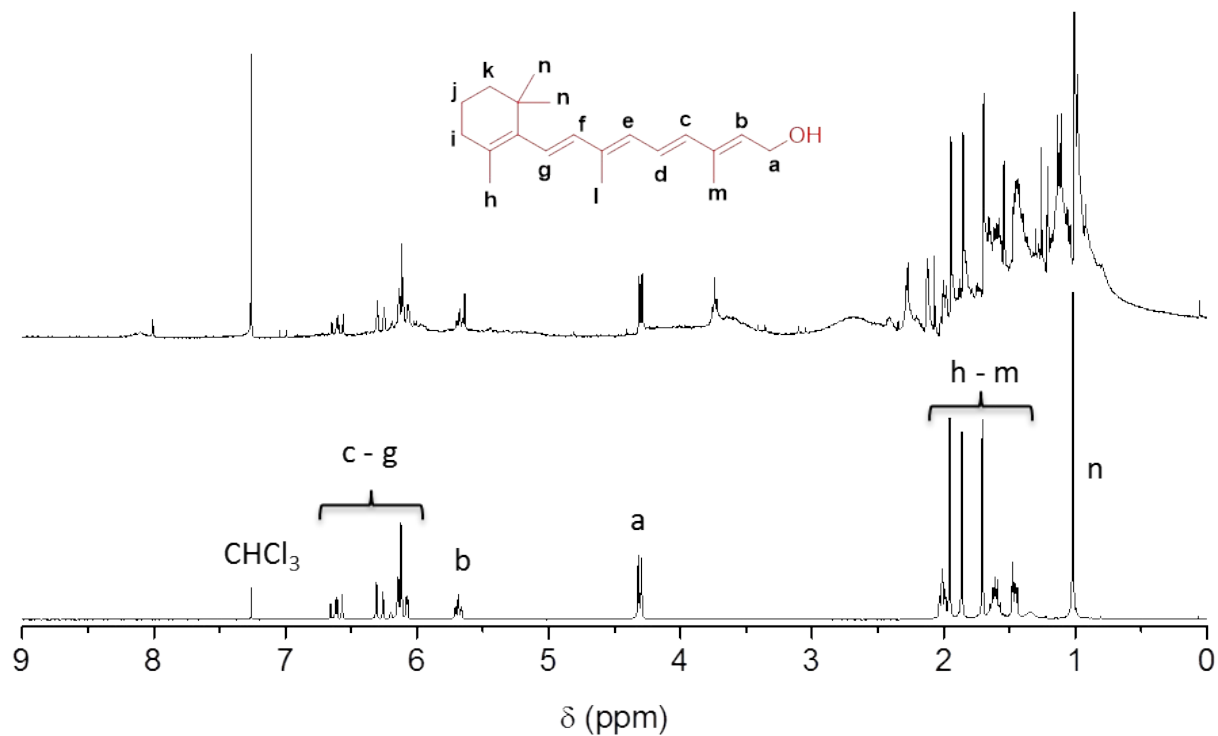

**Figure S7.** Overlay of  $^1\text{H}$  NMR spectra of fresh retinol (bottom) and retinol after storage for 15 days at room temperature under daylight (top).

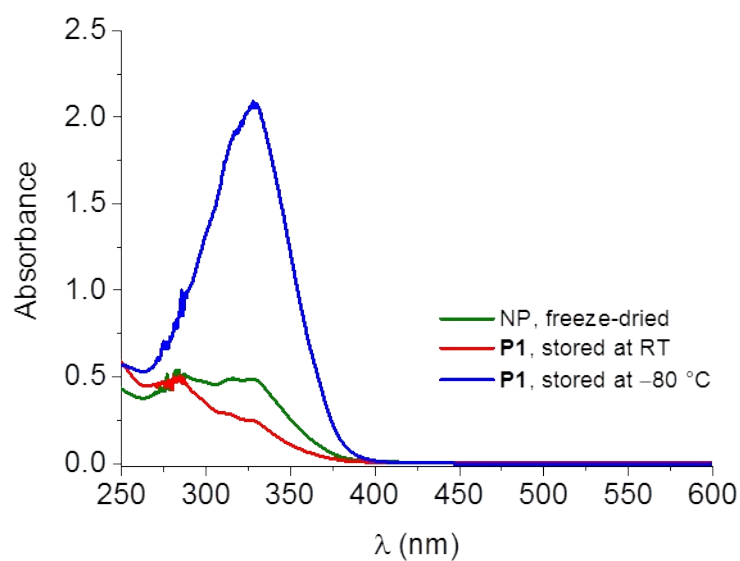

**Figure S8.** Overlay of UV/vis spectra of the freeze-dried NP with P1 stored at RT and  $-80\text{ }^\circ\text{C}$  for 15 days.

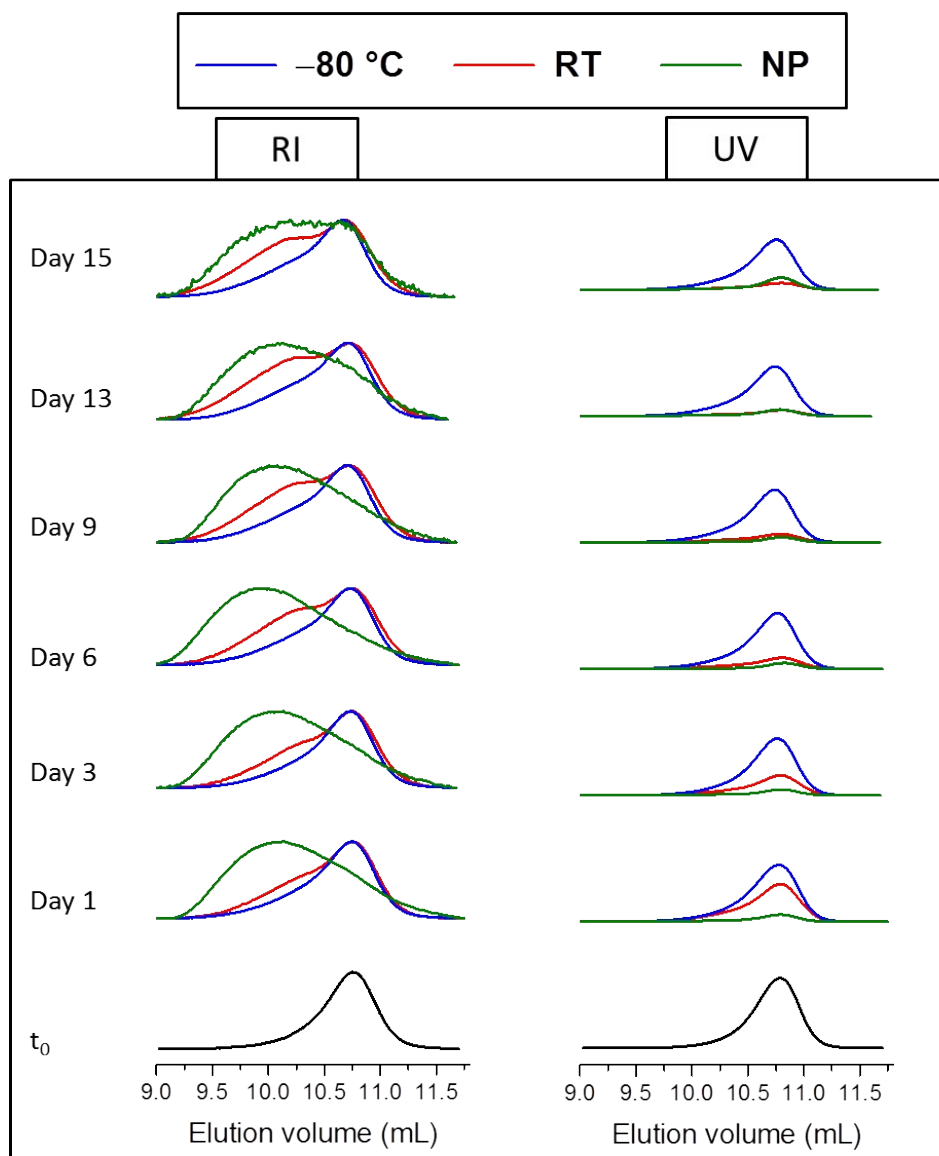

**Figure S9.** Overlay of normalized SEC elugrams recorded with RI and UV ( $\lambda = 340$  nm) detection during stability tests of **P1** ( $t_0$ , and different storage conditions; RT and  $-80$  °C) and the corresponding NP. SEC curves recorded with UV detection were normalized according to corresponding RI signals.



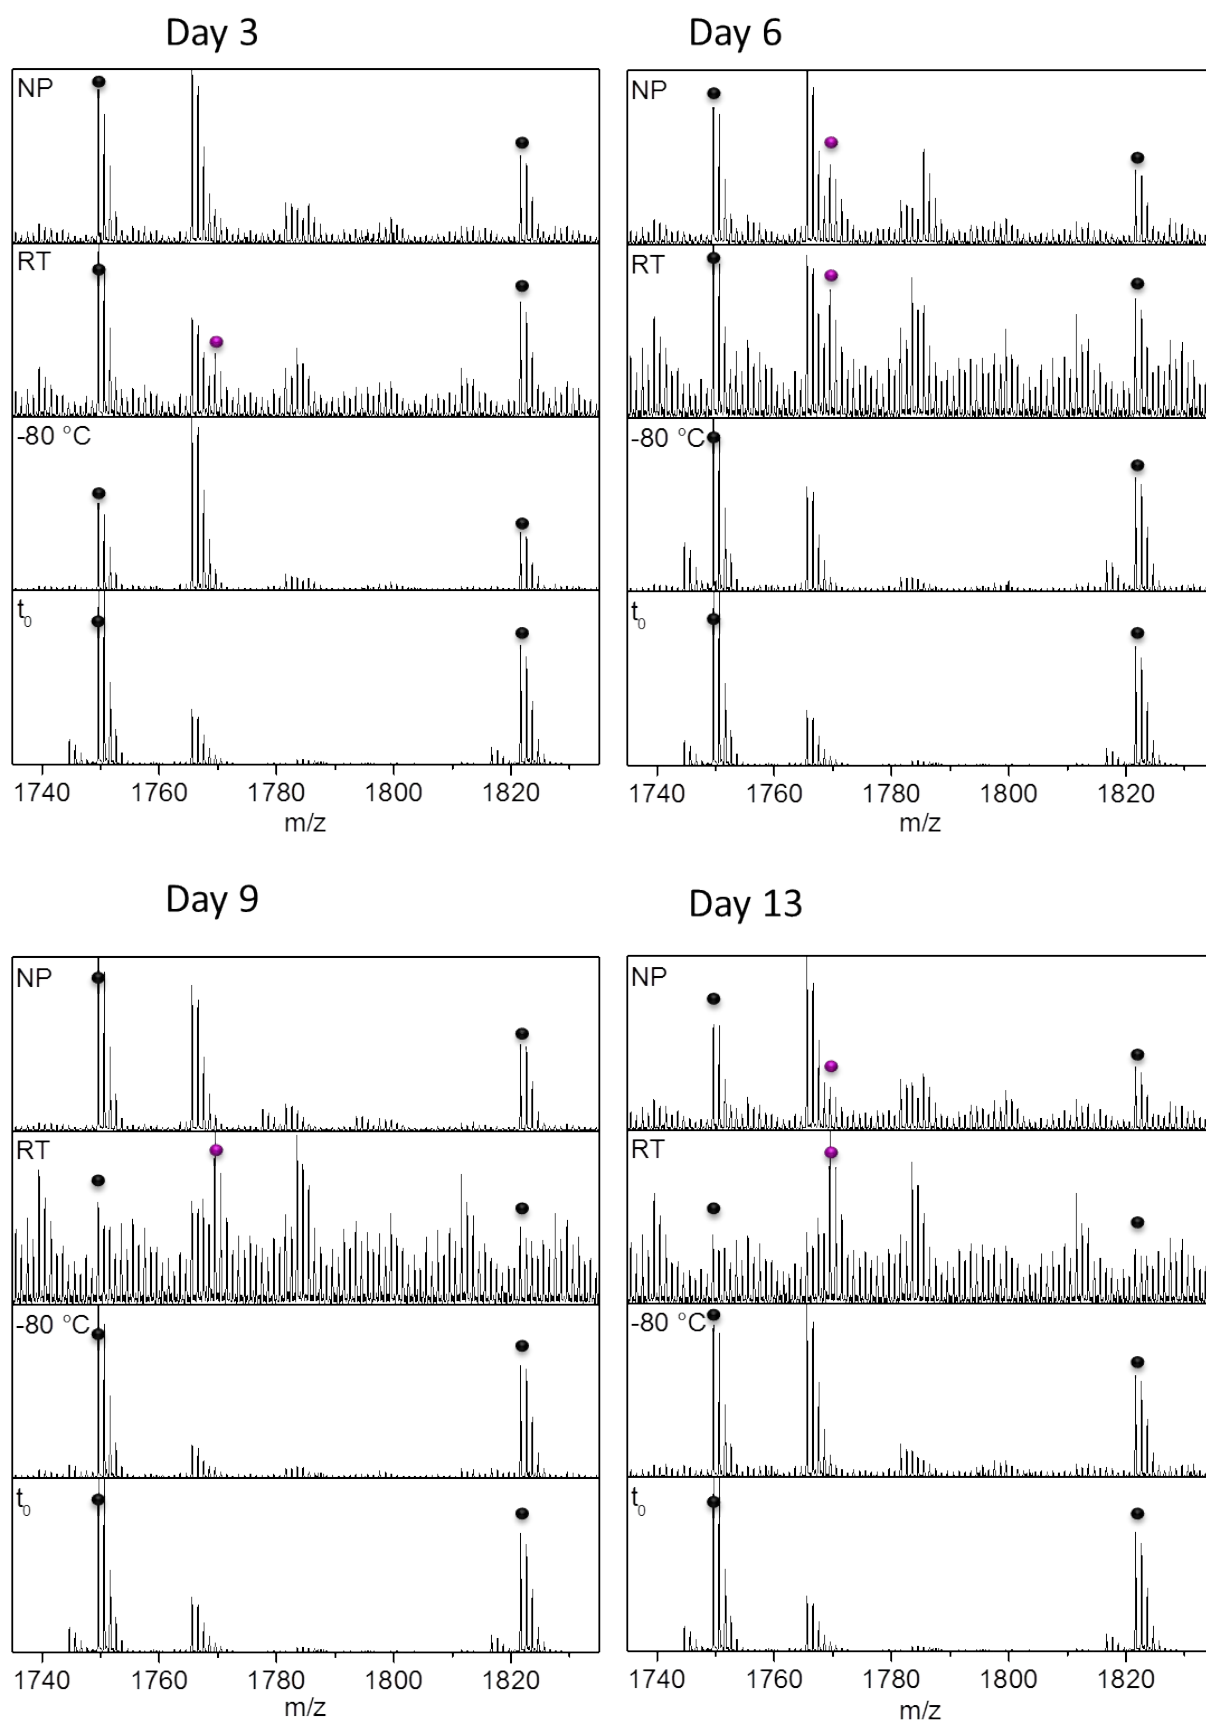

**Figure S10.** Overlay of ESI-Q-ToF mass spectra of **P1** ( $t_0$  and different storage conditions; RT and -80 °C) and of the corresponding NP. The black and purple dots are added for clarity to indicate the presence of species “a” and “g” (See **Figure 8**).

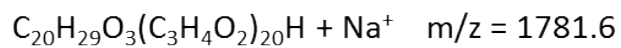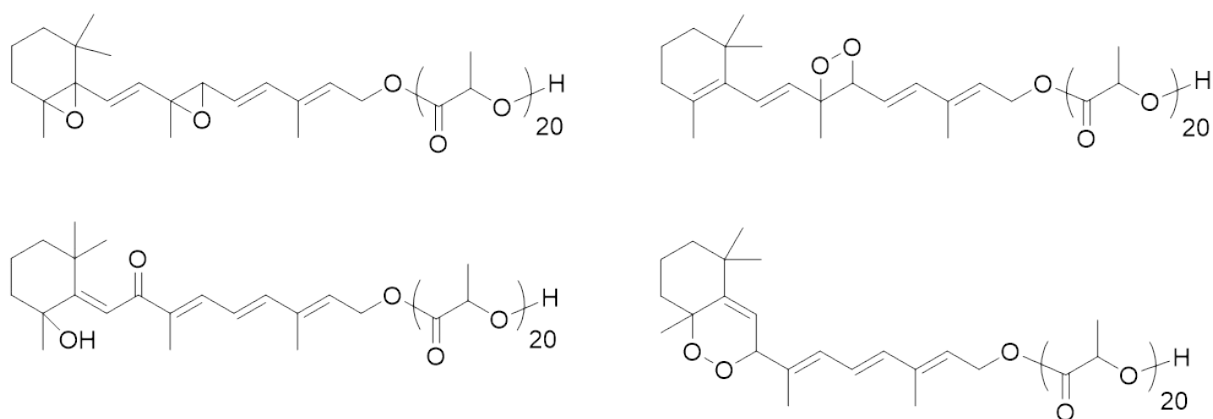

**Figure S11.** Examples for possible isomers of species "d" in **Figure 8**.

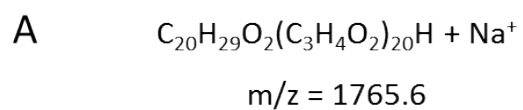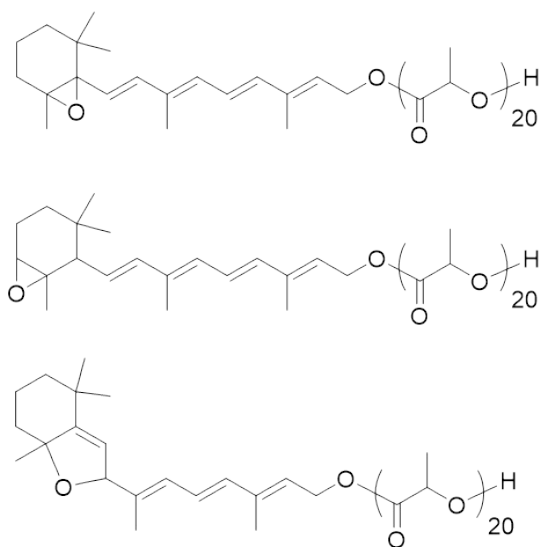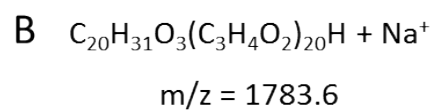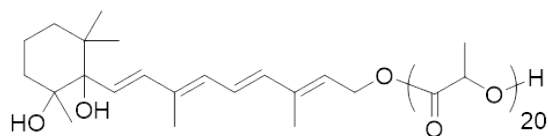

**Figure S12.** Examples for possible isomers of species "h" (**A**) and species "i" (**B**) in **Figure 8**.

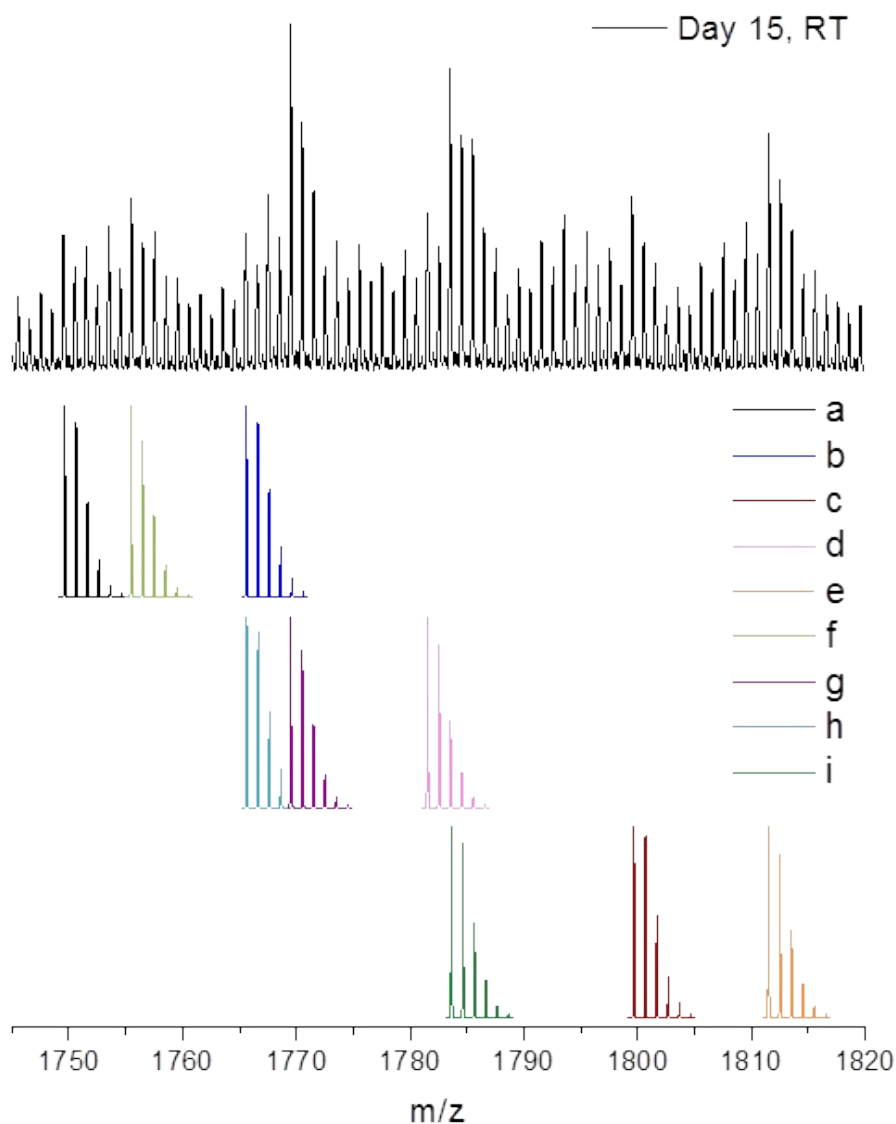

**Figure S13.** Overlay of the ESI-Q-ToF mass spectrum of **P1** recorded after 15 days of storage at room temperature and under daylight with the calculated isotopic patterns of likely degradation products (compare **Figure 8**).

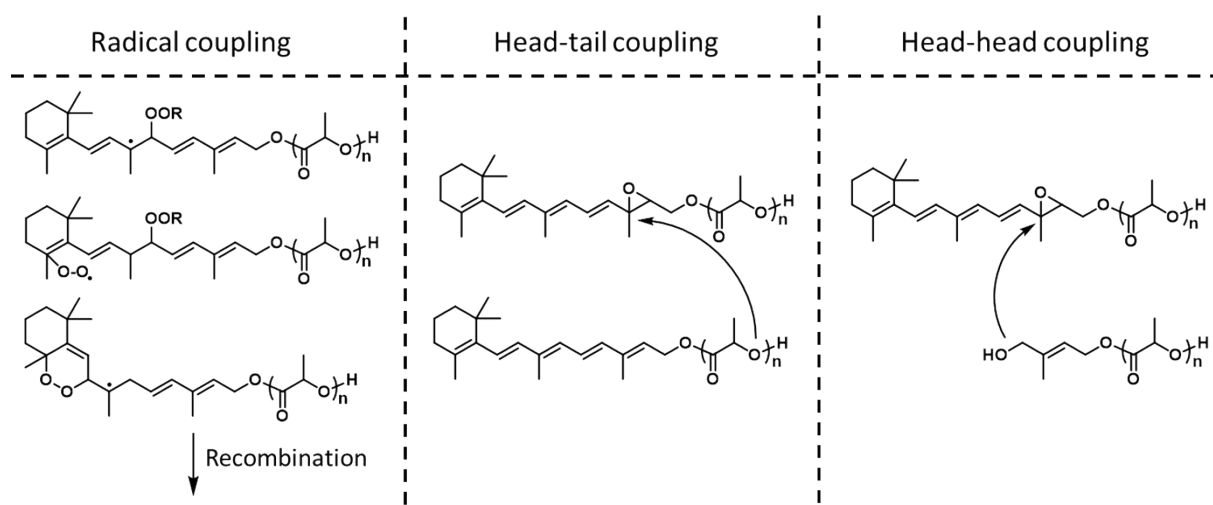

**Figure S14.** Examples for possible coupling pathways.
